# Supplementary material for: Use of Augmentation Agents for Treating Depression: Analysis of a Psychiatric Electronic Medical Record Data Set
Source: Atypon-hosted journal article supplement (doi:10.1176/appi.ps.201300288), 2014-06-16
Supplement: 1062_ds001.pdf [file 1062_ds001.pdf]

 


Psychiatry Online
