# Supplementary material for: Use of Augmentation Agents for Treating Depression: Analysis of a Psychiatric Electronic Medical Record Data Set
Source: Atypon-hosted journal article supplement (doi:10.1176/appi.ps.201300288), 2014-06-16
Supplement: 1062_ds001.pdf [file 1062_ds001.pdf]

## **Appendix**

### *Data source*

The data for the study were obtained from MindLinc, a psychiatric electronic medical record (EMR) database representing an anonymous subset of clinical data generated from the use of EMR at multiple sites. The repository is made up of medical records from a national sample of academic centers, behavioral health departments, community mental health centers, and regional hospitals. MindLinc was initially deployed in 2000 and used since then by the Department of Psychiatry and Behavioral Sciences at Duke University Medical Center, functioning as a full patient EMR for all psychiatric services across all treatment settings (inpatient, outpatient, and emergency room). The system was designed and developed by practicing psychiatrists and requires clinicians to collect a certain subset of data called a "qualified clinical visit." This data set includes a diagnosis, a clinical measure (Clinical Global Impressions – Severity [CGI-S]), medications prescribed, other medical conditions, and services rendered.

### *Inclusion/exclusion criteria*

Patients 18 years of age or older who have a diagnosis of depression on the index date (including major depression single episode, major depression recurrent, depression not otherwise specified [NOS] or dysthymia) and who were initiating augmented therapy for treatment of depression were included in the study.

Patients with other conditions that may warrant the use of augmentation strategies, such as schizophrenia, schizoaffective disorder, bipolar disorder, and epilepsy, were excluded from the analysis. Also excluded were patients with a CGI-S score of 1 or missing on the index date, patients using any of the augmentation agents or combination therapy in the pre-index period, patients having an index visit in an inpatient setting, and patients with psychotic depression. In addition, patients with no antidepressant use (monotherapy) in the 12-month pre-index period or with no visits within the MindLinc system during the 12-month pre-index period were excluded.

### *Patient demographics and clinical characteristics*

Baseline demographics and clinical characteristics of the overall cohort by augmentation agent are summarized in Appendix Table 2. A total of 3,209 patients initiated augmentation therapy for depression, with most receiving treatment in an academic center (54%; n=1,736) or community mental health center (33%; n=1,049). Patients were predominantly white (71%; n=2,269), female (70%; n=2,240) and over 31 years of age (77%; n=2,481). Clinical characteristics are summarized in Appendix Table 3.

### *Treatment patterns*

Treatment patterns are summarized in Appendix Figure 1. Within combination antidepressants, patients most commonly received a combination of selective serotonin reuptake inhibitors (SSRIs) and bupropion (23%; n=558), followed by a SSRI + serotonin modulator or norepinephrine–serotonin modulator (16%; n=385). Quetiapine (40%; n=141) and aripiprazole (31%; n=111) were the most common atypical antipsychotics used for augmentation. The most commonly used mood stabilizer for augmentation was gabapentin (40%; n=104), followed by lamotrigine (21%; n=57); while methamphetamine (56%; n=93) and dextroamphetamine (35%; n=59) were the most commonly used stimulants.

The utilization of augmentation agents showed a time trend, with the utilization of atypical antipsychotics increasing slightly after their approval (2008 and beyond) for the treatment of depression (13%) compared with the pre-approval period (9%). In contrast, there was a slight decrease in the use of antidepressant combinations in 2008 and beyond (73%) compared with previous years (79%). The use of mood stabilizers and stimulants remained relatively consistent throughout the period analyzed (January 2001 to June 2011).

A significantly lower proportion of patients augmented with stimulants had metabolic comorbidities, such as diabetes, hypertension, and hyperlipidemia, compared with patients augmented with other strategies. There was no difference in the proportion of patients with anxiety disorder between the different augmentation strategies. No significant differences in mean baseline CGI-S scores were observed within the atypical antipsychotic group (aripiprazole =  $4.2 \pm 0.8$ ; quetiapine =  $4.3 \pm 0.8$ ; risperidone =  $4.3 \pm 0.9$ ; olanzapine =  $4.5 \pm 1.0$  [ $p=.636$ ]).

| <b>Appendix Table 1</b>                         |                         |                 |               |               |
|-------------------------------------------------|-------------------------|-----------------|---------------|---------------|
| Medications for treatment of depression         |                         |                 |               |               |
| Major class                                     | Subclass                | Medication      |               |               |
| Antidepressant                                  | SSRI                    | Citalopram      | Sertraline    |               |
|                                                 |                         | Escitalopram    | Paroxetine    |               |
|                                                 |                         | Fluoxetine      | Fluvoxamine   |               |
|                                                 | SNRI                    | Desvenlafaxine  |               |               |
|                                                 |                         | Duloxetine      |               |               |
|                                                 |                         | Venlafaxine     |               |               |
|                                                 | TCA                     | Amitriptyline   |               | Amoxapine     |
|                                                 |                         | Clomipramine    |               | Desipramine   |
|                                                 |                         | Doxepin         |               | Imipramine    |
|                                                 |                         | Nortriptyline   |               | Protriptyline |
|                                                 |                         | Trimipramine    |               | Maprotiline   |
|                                                 | MAO-I                   | Isocarboxazid   |               |               |
|                                                 |                         | Phenelzine      |               |               |
|                                                 |                         | Tranylcypromine |               |               |
|                                                 | Bupropion               | Bupropion SR    |               |               |
|                                                 |                         | Bupropion XL    |               |               |
|                                                 |                         | Bupropion       |               |               |
|                                                 |                         |                 |               |               |
| Serotonin or norepinephrine–serotonin modulator | Nefazodone              |                 | Mirtazapine   |               |
|                                                 | Trazodone               |                 | Vilazodone    |               |
|                                                 |                         |                 |               |               |
| Antipsychotic                                   | Atypical antipsychotics | Aripiprazole    | Quetiapine    |               |
|                                                 |                         | Clozapine       | Risperidone   |               |
|                                                 |                         | Olanzapine      | Ziprasidone   |               |
|                                                 |                         | Paliperidone    |               |               |
|                                                 |                         |                 |               |               |
| Mood stabilizer                                 | –                       | Lithium         |               |               |
|                                                 | Anticonvulsant          | Carbamazepine   | Oxcarbazepine |               |
|                                                 |                         | Valproate       | Pregabalin    |               |
|                                                 |                         | Gabapentin      | Tiagabine     |               |
|                                                 |                         | Lamotrigine     | Topiramate    |               |

|           |  |                   |                 |
|-----------|--|-------------------|-----------------|
|           |  | Levetiracetam     |                 |
| Stimulant |  | Amphetamine       | Methylphenidate |
|           |  | Dextroamphetamine | Modafinil       |
|           |  | Methamphetamine   | Mazindol        |

MAO-I, monoamine oxidase inhibitor; SNRI, selective norepinephrine reuptake inhibitor; SR, sustained-release; SSRI, selective serotonin reuptake inhibitor; TCA, tricyclic antidepressant; XL, extended-release.

| <b>Appendix Table 2</b>              |                    |                                       |                                                |                             |                       |                      |
|--------------------------------------|--------------------|---------------------------------------|------------------------------------------------|-----------------------------|-----------------------|----------------------|
| Baseline demographic characteristics |                    |                                       |                                                |                             |                       |                      |
|                                      | Total<br>(N=3,209) | Atypical<br>antipsychotics<br>(n=356) | Combination of<br>antidepressants<br>(n=2,420) | Mood stabilizers<br>(n=266) | Stimulants<br>(n=167) | p Value <sup>a</sup> |
| Males, %                             | 30.2               | 32.3                                  | 29.9                                           | 23.3                        | 40.7                  | .001                 |
| White, %                             | 70.7               | 65.8                                  | 69.8                                           | 74.8                        | 89.6                  | <.001                |
| Age categories, %                    |                    |                                       |                                                |                             |                       | <.001                |
| 18–30 y                              | 22.7               | 24.2                                  | 22.3                                           | 15.4                        | 37.1                  |                      |
| 31–45 y                              | 32.8               | 31.2                                  | 32.4                                           | 38.7                        | 32.9                  |                      |
| 46–64 y                              | 34.5               | 34.0                                  | 34.9                                           | 38.0                        | 25.1                  |                      |
| 65+ y                                | 9.9                | 10.7                                  | 10.4                                           | 7.9                         | 4.8                   |                      |
| Site type, %                         |                    |                                       |                                                |                             |                       | <.001                |
| Academic center                      | 54.1               | 40.2                                  | 56.1                                           | 47.0                        | 65.9                  |                      |
| CMHC                                 | 32.7               | 43.3                                  | 30.3                                           | 40.6                        | 31.7                  |                      |
| Regional hospital                    | 13.2               | 16.6                                  | 13.6                                           | 12.4                        | 2.4                   |                      |

| Index year, % |      |      |      |      |      | .051 |
|---------------|------|------|------|------|------|------|
| 2001          | 4.1  | 1.4  | 4.5  | 4.1  | 4.2  |      |
| 2002          | 5.8  | 4.5  | 6.0  | 6.4  | 3.6  |      |
| 2003          | 6.0  | 3.9  | 6.6  | 5.3  | 4.2  |      |
| 2004          | 4.9  | 2.5  | 5.2  | 6.0  | 3.0  |      |
| 2005          | 3.6  | 3.4  | 3.7  | 4.5  | 1.8  |      |
| 2006          | 6.5  | 6.7  | 6.7  | 3.0  | 7.8  |      |
| 2007          | 8.8  | 8.1  | 8.8  | 10.2 | 9.0  |      |
| 2008          | 11.3 | 10.7 | 11.2 | 12.0 | 13.2 |      |
| 2009          | 16.3 | 18.0 | 16.2 | 14.7 | 16.8 |      |
| 2010          | 20.4 | 26.7 | 19.5 | 19.9 | 21.6 |      |
| 2011          | 12.2 | 14.0 | 11.6 | 13.9 | 15.0 |      |

<sup>a</sup> Chi-squared bivariate analysis and analysis of variance. CMHC, community mental health care center.

| <b>Appendix Table 3</b>           |                    |                                       |                                                |                                |                       |                      |
|-----------------------------------|--------------------|---------------------------------------|------------------------------------------------|--------------------------------|-----------------------|----------------------|
| Baseline clinical characteristics |                    |                                       |                                                |                                |                       |                      |
|                                   | Total<br>(N=3,209) | Atypical<br>antipsychotics<br>(n=356) | Combination of<br>antidepressants<br>(n=2,420) | Mood<br>stabilizers<br>(n=266) | Stimulants<br>(n=167) | p Value <sup>a</sup> |
| Type of depression diagnosis, %   |                    |                                       |                                                |                                |                       |                      |
| MDD-naive                         | 15.9               | 14.0                                  | 16.6                                           | 13.9                           | 12.6                  | .261                 |
| MDD-recurrent                     | 58.5               | 64.9                                  | 58.0                                           | 53.8                           | 58.7                  | .034                 |
| MDD-NOS                           | 15.1               | 14.0                                  | 14.5                                           | 21.1                           | 15.6                  | .039                 |
| Dysthymia                         | 10.6               | 7.0                                   | 10.9                                           | 11.3                           | 13.2                  | .098                 |
| CGI-S, %                          |                    |                                       |                                                |                                |                       | <.001                |
| Mild/moderate (2–3)               | 25.0               | 13.0                                  | 26.5                                           | 22.8                           | 33.6                  |                      |
| Moderate (4)                      | 47.9               | 46.2                                  | 48.2                                           | 50.2                           | 44.3                  |                      |
| Severe (5–7)                      | 27.0               | 40.8                                  | 25.3                                           | 27.0                           | 22.1                  |                      |
| Other DSM diagnosis, %            |                    |                                       |                                                |                                |                       |                      |
| Adjustment disorder               | 6.3                | 10.1                                  | 5.8                                            | 6.8                            | 4.8                   | .016                 |

|                                              |      |      |      |      |      |       |
|----------------------------------------------|------|------|------|------|------|-------|
| Anxiety disorder                             | 47.8 | 48.3 | 47.9 | 48.1 | 44.9 | .891  |
| Eating disorders                             | 2.5  | 0.8  | 2.7  | 2.6  | 2.4  | .207  |
| Personality disorders                        | 11.7 | 17.1 | 10.6 | 16.2 | 10.2 | <.001 |
| Somatic disorders                            | 2.0  | 3.7  | 1.4  | 5.3  | 1.8  | <.001 |
| Substance abuse disorders                    | 17.6 | 21.1 | 17.3 | 17.7 | 15.0 | .270  |
| Benzodiazepines use before the index date, % | 35.8 | 41.6 | 34.5 | 43.6 | 31.1 | .001  |
| Medical comorbidities, %                     |      |      |      |      |      |       |
| Diabetes                                     | 8.3  | 7    | 8.5  | 11.3 | 3.6  | .031  |
| Hypertension                                 | 19.5 | 22.2 | 20.1 | 18.4 | 7.2  | <.001 |
| Lipid disorders                              | 10.0 | 8.1  | 10.7 | 9.8  | 4.2  | .030  |
| Obesity                                      | 7.4  | 7.3  | 7.4  | 7.5  | 7.2  | .999  |

<sup>a</sup> Chi-squared bivariate analysis and analysis of variance. CGI-S, Clinical Global Impressions – Severity; DSM, Diagnostic and Statistical Manual; MDD, major depressive disorder; NOS, not otherwise specified. Only conditions with a prevalence of  $\geq 2\%$  are reported in the table.



**Appendix Figure 1**

Augmentation agents used for the treatment of major depressive disorder (N=3,209)

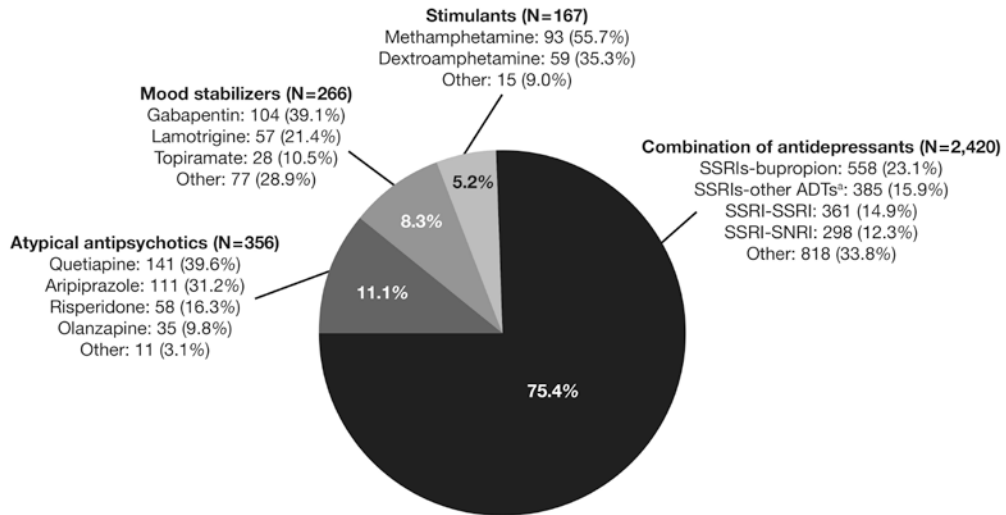

ADT, antidepressant treatment (nefazodone, trazodone, mirtazapine, and vilazodone); SNRI, selective norepinephrine reuptake inhibitor; SSRI, selective serotonin reuptake inhibitor.

**Appendix Figure 2**

Logistic regression analysis showing predictors of atypical antipsychotic augmentation treatment compared with other agents based on baseline CGI-S score. A mild CGI-S score was used as reference.

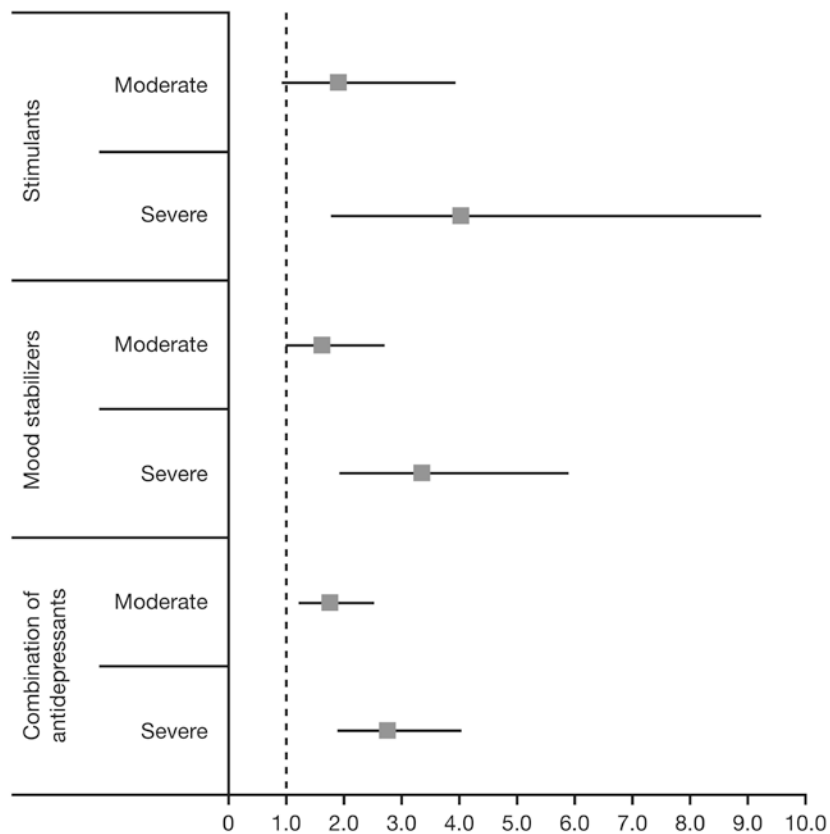

CGI-S, Clinical Global Impressions – Severity.
